# Supplementary material for: Response of Soil Microbial Community Structure to Phosphate Fertilizer Reduction and Combinations of Microbial Fertilizer
Source: Frontiers journal article supplement (doi:10.3389/fenvs.2022.899727), 2022-06-24
Supplement: Image_1.pdf [file Image_1.pdf]

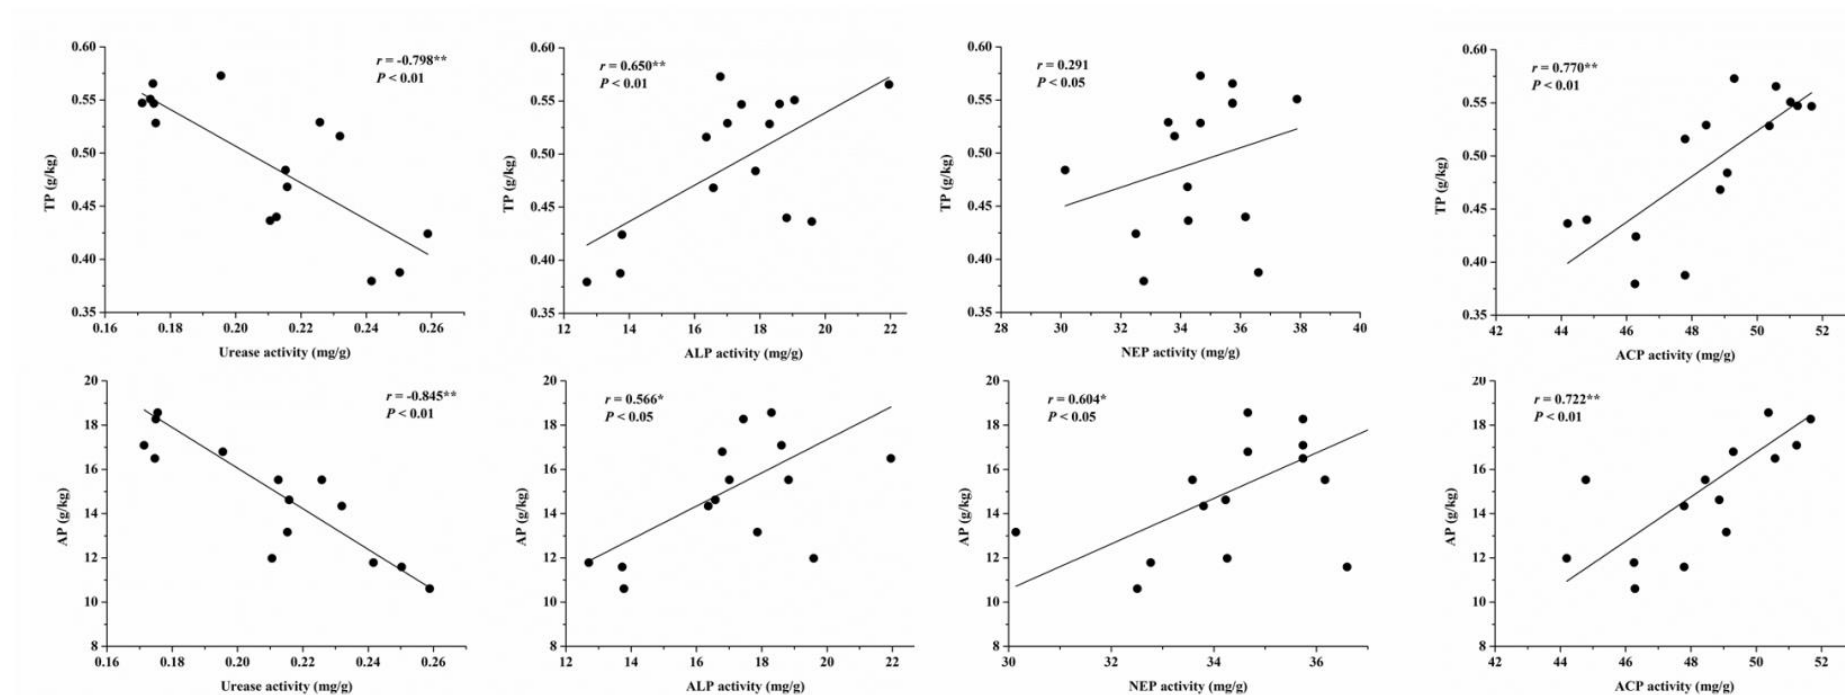

**FIGURE S1** | The relationship between the soil enzymatic activity and TP, AP. \*, \*\* respectively indicated  $P < 0.05$ ,  $P < 0.01$ . TP, total phosphorus; AP, available phosphorus; ACP, acid phosphatase; NEP, neutral phosphatase; ALP, alkaline phosphatase.
