# Supplementary material for: Response of Soil Microbial Community Structure to Phosphate Fertilizer Reduction and Combinations of Microbial Fertilizer
Source: Frontiers journal article supplement (doi:10.3389/fenvs.2022.899727), 2022-06-24
Supplement: Table_1.docx [file Table_1.docx]

| **TABLE S1 |** Fertilizer application rates for the different treatments in the field experiment. | | | | | | |
| --- | --- | --- | --- | --- | --- | --- |
| Treatment | N | P2O5 | K2O | microorganism blended fertilizer | DAP | microbial agent |
| （kg/hm2） | （kg/hm2） | （kg/hm2） | （kg/hm2） | （kg/hm2） |
| P0 | 210 | 0 | 90 | - | - | - |
| FP | 210 | 120 | 90 | - | 260.87 | - |
| P1 | 210 | 84 | 90 | 700 | - | - |
| P2 | 210 | 84 | 90 | 560 | 36.52 | - |
| P3 | 210 | 84 | 90 | - | 182.61 | + |
| DAP, diammonium phosphate. | | | | | | |
