# Supplementary material for: Response of Soil Microbial Community Structure to Phosphate Fertilizer Reduction and Combinations of Microbial Fertilizer
Source: Frontiers journal article supplement (doi:10.3389/fenvs.2022.899727), 2022-06-24
Supplement: Table_2.docx [file Table_2.docx]

| **TABLE S2** | Illumina MiSeq sequenced bacterial data based on 16srRNA gene. | | |
| --- | --- | --- |
| Samples | raw_tags | clean_tags |
| P0_1 | 33331 | 31258 |
| P0_2 | 36889 | 35947 |
| P0_3 | 38180 | 36629 |
| FP_1 | 37550 | 36354 |
| FP_2 | 32897 | 31989 |
| FP_3 | 41426 | 40483 |
| P1_1 | 41482 | 40644 |
| P1_2 | 42520 | 41515 |
| P1_3 | 41284 | 40114 |
| P2_1 | 42875 | 41731 |
| P2_2 | 41474 | 40173 |
| P2_3 | 47105 | 45456 |
| P3_1 | 44868 | 43992 |
| P3_2 | 42127 | 41189 |
| P3_3 | 49855 | 48530 |
| raw_tags, spliced from filtered and low-quality fastq data. clean_ tags, further removing chimeras and short sequences from the splicing results. | | |
