# Supplementary material for: Response of Soil Microbial Community Structure to Phosphate Fertilizer Reduction and Combinations of Microbial Fertilizer
Source: Frontiers journal article supplement (doi:10.3389/fenvs.2022.899727), 2022-06-24
Supplement: Table_3.docx [file Table_3.docx]

| **TABLE S3** | Illumina MiSeq sequenced bacterial data based on ITS gene. | | |
| --- | --- | --- |
| Samples | raw_tags | clean_tags |
| P0_1 | 49043 | 47120 |
| P0_2 | 47230 | 44770 |
| P0_3 | 43117 | 41820 |
| FP_1 | 52191 | 49008 |
| FP_2 | 52897 | 49544 |
| FP_3 | 48917 | 47566 |
| P1_1 | 42116 | 40144 |
| P1_2 | 43460 | 42024 |
| P1_3 | 42229 | 35632 |
| P2_1 | 46757 | 44296 |
| P2_2 | 48881 | 47660 |
| P2_3 | 48687 | 47597 |
| P3_1 | 44503 | 41045 |
| P3_2 | 42382 | 41242 |
| P3_3 | 41754 | 40944 |
| raw_tags, spliced from filtered and low-quality fastq data. clean_ tags, further removing chimeras and short sequences from the splicing results. | | |
