# Supplementary material for: Response of Soil Microbial Community Structure to Phosphate Fertilizer Reduction and Combinations of Microbial Fertilizer
Source: Frontiers journal article supplement (doi:10.3389/fenvs.2022.899727), 2022-06-24
Supplement: Table_4.docx [file Table_4.docx]

| **TABLE S4 |** The explanation rate and contribution rate in CCA of soil bacterial community structure and soil properties under different P fertilizer application systems. | | | | |
| --- | --- | --- | --- | --- |
|  | Explains % | Contribution % | pseudo-F | *P* |
| AP | 12.5 | 22.2 | 1.9 | 0.004 |
| TP | 7.4 | 13.1 | 1.1 | 0.288 |
| TN | 6.3 | 11.2 | 0.9 | 0.568 |
| pH | 7.3 | 12.9 | 1.1 | 0.342 |
| AN | 6.5 | 11.6 | 1 | 0.552 |
| TK | 5.6 | 10 | 0.8 | 0.67 |
| AK | 5.6 | 10 | 0.8 | 0.692 |
| SOM | 5.1 | 9 | 0.7 | 0.752 |
| SOM, soil organic carbon; TN, total nitrogen; TP, total phosphorus; TK, total potassium; AN, available nitrogen; AP, available phosphorus; AK, available potassium. | | | | |
