# Supplementary material for: Response of Soil Microbial Community Structure to Phosphate Fertilizer Reduction and Combinations of Microbial Fertilizer
Source: Frontiers journal article supplement (doi:10.3389/fenvs.2022.899727), 2022-06-24
Supplement: Table_5.docx [file Table_5.docx]

| **TABLE S5 |** The explanation rate and contribution rate in CCA of soil fungal community structure and soil properties under different P fertilizer application systems. | | | | |
| --- | --- | --- | --- | --- |
|  | Explains % | Contribution % | pseudo-F | *P* |
| AP | 9.1 | 15.9 | 1.3 | 0.196 |
| TN | 8.3 | 14.6 | 1.2 | 0.258 |
| pH | 8.1 | 14.2 | 1.2 | 0.266 |
| SOM | 8.3 | 14.5 | 1.2 | 0.242 |
| AN | 8.9 | 15.5 | 1.4 | 0.202 |
| AK | 7.2 | 12.6 | 1.1 | 0.282 |
| TK | 4.4 | 7.6 | 0.7 | 0.69 |
| TP | 3 | 5.2 | 0.4 | 0.89 |
| SOM, soil organic carbon; TN, total nitrogen; TP, total phosphorus; TK, total potassium; AN, available nitrogen; AP, available phosphorus; AK, available potassium. | | | | |
